## 1 Isolation and Characterization of SARS-CoV-2 strains circulating in Eastern India.

2 Bharati Singh<sup>1,2,#</sup>, Kiran Avula<sup>1,3,#</sup>, Sanchari Chatterjee<sup>1,3,#</sup>, Ankita Datey<sup>1,2,#</sup>, Arup Ghosh<sup>1,2</sup>,  
3 Saikat De<sup>1,3</sup>, Supriya Suman Keshry<sup>1,2</sup>, Soumyajit Ghosh<sup>1,3</sup>, Amol Suryawanshi<sup>1</sup>, Rupesh  
4 Dash<sup>1</sup>, Shantibhusan Senapati<sup>1</sup>, Tushar K. Beuria<sup>1</sup>, Punit Prasad<sup>1</sup>, Sunil Raghav<sup>1</sup>, Rajeeb  
5 Swain<sup>1</sup>, Ajay Parida<sup>1</sup>, Gulam Hussain Syed<sup>1\*</sup> and Soma Chattopadhyay<sup>1\*</sup>

6 1. Institute of Life Sciences, Bhubaneswar, Odisha, India

7 2. School of Biotechnology, Kalinga Institute of Industrial Technology, Bhubaneswar, India

8 3. Regional Centre for Biotechnology, Faridabad, India

9 # Equal contributors

10 \* Corresponding authors

11

### 12 **Abstract:**

13 Emergence of SARS-CoV-2 as a serious pandemic has altered the global socioeconomic  
14 dynamics. The wide prevalence, high death counts and rapid emergence of new variants urge  
15 for establishment of research infrastructure to facilitate rapid development of efficient  
16 therapeutic modalities and preventive measures. In agreement with this, five SARS-CoV2  
17 strains (ILS01, ILS02, ILS03, ILS15 and ILS24) of four different clades (19A, 19B, 20A and  
18 20B) were isolated from patient swab samples collected during the 1<sup>st</sup> COVID-19 wave in  
19 Odisha, India. The viral isolates were adapted to *in-vitro* cultures and further characterized to  
20 identify strain specific variations in viral growth characteristics. All the five isolates showed  
21 substantial amount of virus induced CPE however ILS03 belonging to 20A clade displayed  
22 highest level of CPE. Time kinetics experiment revealed spike protein expression was evident  
23 after 16th hours post infection in all five isolates. ILS03 induced around 90% of cytotoxicity.  
24 Further, the susceptibility of various cell lines (human hepatoma cell line (Huh-7), CaCo2 cell  
25 line, HEK-293T cells, Vero, Vero-E6, BHK-21, THP-1 cell line and RAW 264.7 cells) were  
26 assessed. Surprisingly, it was found that the human monocyte cells THP-1 and murine  
27 macrophage cell line RAW 264.7 were permissive to all the SARS-CoV-2 isolates. The  
28 neutralization susceptibility of viral isolates to vaccine-induced antibodies was determined  
29 using sera from individuals vaccinated in the Government run vaccine drive in India. The  
30 micro-neutralization assay suggested that both Covaxin and Covishield vaccines were equally  
31 effective (100% neutralization) against all of the isolates. The whole genome sequencing of  
32 culture adapted viral isolates and viral genome from patient oropharyngeal swab sample  
33 suggested that repetitive passaging of SARS-CoV2 virus in Vero-E6 cells did not lead to  
34 emergence of many mutations during the adaptation in cell culture. Phylogenetic analyses  
35 revealed that the five isolates clustered to respective clades. The major goal was to isolate and  
36 adapt SARS-CoV-2 viruses in *in-vitro* cell culture with minimal modification to facilitate  
37 research activities involved in understanding the molecular virology, host-virus interactions,  
38 application of these strains for drug discovery and animal challenge models development which  
39 eventually will contribute towards the development of effective and reliable therapeutics.

40

### 41 **Introduction**

42 Since its emergence in December 2019, in Wuhan, China, the Severe Acute Respiratory  
43 Syndrome Coronavirus 2 (SARS-CoV-2) has had an unprecedented effect on human health  
44 and well-being world over <sup>1-3</sup>. According to WHO data, the virus has infected 240 million  
45 individuals worldwide and has so far caused 4.8 million fatalities<sup>4</sup>. SARS-CoV-2 is a single-  
46 stranded, positive-sense RNA virus of the *Coronavirus* genus, family *Coronaviridae* and order  
47 *Nidovirales* <sup>3</sup>. SARS-CoV-2 genome is around 30 kb in size and shares 79% and 50%  
48 homology with the genome of SARS-CoV and MERS-CoV, the causative agents of two earlier  
49 coronavirus epidemics in 2002-03 and 2012. Based on the reproductive number ( $R_0$ ) SARS-  
50 CoV-2 (2- 2.2) is highly infectious then SARS-CoV (1.7-1.9) & MERS-CoV ( $<1$ ) <sup>5</sup>.

51 The SARS-CoV-2 genome ORF1a/ORF1ab encodes for two polyproteins, pp1a/pp1ab which  
52 account for 2/3<sup>rd</sup> of the viral genome, and the remaining 1/3<sup>rd</sup> near the 3'-end encodes for four  
53 structural proteins Spike (S), Envelope (E), Membrane (M), and Nucleocapsid (N) <sup>1</sup>. The  
54 overlapping pp1a and pp1ab, are proteolytically cleaved by papain-like and chymotrypsin-like  
55 viral proteases (PL<sup>pro</sup> & CL<sup>pro</sup>) to yield 16 non-structural proteins, which play an important role  
56 in virus life cycle with cooperation from other accessory viral proteins <sup>6</sup>. The transmission of  
57 this virus occurs mainly through aerosols/liquid droplets that emanate from the cough/sneeze  
58 from infected patients <sup>7</sup>. Majority of the infected individuals are either asymptomatic or exhibit  
59 mild flu like symptoms, whereas few patients exhibit severe clinical manifestation leading to  
60 the severe Acute Respiratory Distress Syndrome (ARDS) <sup>8</sup>.

61 The global prevalence of SARS-CoV-2 & rampant growth in the human host lead to emergence  
62 of mutational variability among circulating viruses. Presence of multiple variants with  
63 variability in infection/transmission and disease manifestation urge for isolation of the  
64 circulating SARS-CoV-2 variants to enhance our understanding in variant specific differences  
65 in viral growth characteristics, host interactions and disease pathogenesis. In this study, five  
66 circulating strains of SARS-CoV-2 belonging to early clades have been isolated from  
67 laboratory confirmed COVID-19 patients swab samples collected during the 1<sup>st</sup> COVID-19  
68 wave in Odisha, India. The isolated strains have been further characterized and sequenced to  
69 enable utilization of these isolates as resources in research and development towards prevention  
70 and effective therapeutic intervention against COVID-19.

71

## 72 **Materials and method:**

73 **Cells and Viruses:** Vero E6, Vero, BHK-21, HEK293T and Huh7 cells were maintained in  
74 high glucose DMEM supplemented with 10% fetal bovine serum and 1X  
75 Pencillin/Streptomycin. CaCo2 cells were maintained in DMEM supplemented with 20% fetal  
76 bovine serum and 1X Pencillin/Streptomycin. THP-1 and RAW 264.7 were maintained in  
77 RPMI supplemented with 10% fetal bovine serum, 1X Pencillin/Streptomycin, 10 mM sodium  
78 pyruvate, 1M HEPES, and glucose. The details about all the eight cell lines are provided in  
79 Table 1. All the cell cultures were maintained in humidified environment with 5% CO<sub>2</sub> at 37°C.

80

81

82

83 **Table 1:** Details of the various cell lines used in this study.

| S No | Cell line | Source                              |
|------|-----------|-------------------------------------|
| 1    | Vero      | Monkey kidney epithelial cell line  |
| 2    | Vero-E6   | Monkey kidney epithelial cell line  |
| 3    | HEK 293T  | Human embryonic kidney cell line    |
| 4    | Huh-7     | Human hepatoma cell line            |
| 5    | CaCo2     | Human colon epithelial cell line    |
| 6    | BHK-21    | Hamster kidney epithelial cell line |
| 7    | THP       | Human monocytes cells               |
| 8    | RAW 264.7 | Mouse monocytes cells               |

84

85 The cells were seeded a day before infection such that they attain confluence on the day of  
 86 infection. On the day of infection complete media was removed and respective virus infection  
 87 was given at MOI of 0.1 in serum free media for 1.5 hr at 37°C with gentle rocking at every 15  
 88 mins. After 1.5 hr the inoculum was removed and cells were washed twice with PBS and  
 89 supplemented with complete media. Five different viral strains were isolated and characterized  
 90 in the current study. The details regarding these viral strains are mentioned in Table 2.

91 **Table 2:** Accession numbers of the genome sequence and clade information of the viral RNA  
 92 from source swab samples (S) and isolated & culture adapted viruses (A) used in this study.

| Name  | Accession no        | Clade |
|-------|---------------------|-------|
| ILS01 | EPI_ISL_463010 (S)  | 19A   |
|       | MW559533.2 (A)      | 19A   |
| ILS02 | EP_ISL_3039724 (S)  | 20A   |
|       | EPI_ISL_1190402 (A) | 19B   |
| ILS03 | EPI_ISL_463032 (S)  | 20A   |
|       | EPI_ISL_1196305 (A) | 20A   |
| ILS15 | EPI_ISL_463054 (S)  | 20B   |
|       | MW828325.1 (A)      | 20A   |
| ILS24 | EPI_ISL_463058 (S)  | 19B   |
|       | MW828330.1 (A)      | 19B   |

93

94 **Specimen collection:** Oropharyngeal swab samples collected in VTM from suspected  
 95 symptomatic and asymptomatic patients by the various sample collection centres in the state  
 96 of Odisha, India during April-June 2020 were used in this study. The samples were tested for  
 97 presence of virus by qRT-PCR and samples with Ct (Cycle threshold) values below 15 were  
 98 subsequently used for virus isolation. Upon confirmation of infection, the samples were  
 99 aliquoted and kept in deep freezers until further use.

100

101 **Ethics statement:** The current studies involving swab samples from the human participants  
102 were reviewed and approved by the Institutional Human Ethics Committee, Institute of Life  
103 Sciences. The Institutional Ethics Committee (IEC)/ Institutional Review Board (IRB)  
104 reference number is 96/HEC/2020. The written consent form duly signed by the participants/  
105 legal guardian was taken into consideration for the concerned study

106

107 **Virus Isolation:** Oropharyngeal swab samples of confirmed COVID-19 patients were used for  
108 isolation of the virus. The oropharyngeal swab sample was diluted 1:1 with DMEM  
109 supplemented with antibiotics and antifungal agents and filtered through 0.22-micron filter.  
110 Vero E6 cells were infected with the filtered swab sample for 1.5 hr at 37°C with gentle rocking  
111 every 15 mins. The inoculum was aspirated and cells washed with PBS and supplemented  
112 with fresh media containing 2% FBS. The infected cells were regularly monitored for  
113 cytopathic effect <sup>9</sup>. 72 hr post infection the culture supernatants were collected and the clarified  
114 supernatant (at 3000 rpm for 5 mins) were used as inoculum for subsequent (2<sup>nd</sup>) passage of  
115 virus in naïve Vero E6 cells. This process was repeated every 48 hrs up to the 10<sup>th</sup> passage.  
116 RNA isolated from the culture supernatants was used for confirmation of SARS-CoV-2 virus  
117 isolation by qRT-PCR <sup>10</sup>. Virus titres in the culture supernatants was estimated by TCID<sub>50</sub>  
118 assay. RNA isolated from 10<sup>th</sup> passage virus was used for determining the whole genome  
119 sequence. SARS-CoV-2 virus isolation and culture was conducted in the biosafety level-3  
120 containment facility according to the guidelines issued by the Department of Biotechnology,  
121 Government of India. This study has been approved by the Institutional biosafety committee  
122 (IBSC) (IBSC file no. V-122-MISC/2007-08/01).

123

124 **Viral RNA extraction & estimation:** RNA isolation from culture supernatant was performed  
125 using QIAamp Viral RNA Kit (Qiagen, cat. no. 52906) according to the manufacturer's  
126 instructions. The isolated RNA was subjected to qRT-PCR for determining the viral load by  
127 absolute quantification by real-time RT-PCR using Takara PrimeScript™ one-step RT-PCR  
128 Kit (RR055A) with forward (5'-GTGAAATGGTCATGTGTGGCGG-3') and reverse (5'-  
129 CAGATGTAAAGACACTATTAGCATA-3') primers and probe (5'-FAM-  
130 CAGGTGGAACCTCATCAG GAGATGC-BHQ-3') targeting the SARS-CoV2 RdRp gene.  
131 Standard curve was generated using known quantities of SARS-CoV2 viral RNA purified from  
132 the viral stock supernatants.

133

134 **Plaque Assay:** To determine the viral titre plaque assay was performed as described by Mishra  
135 et.al (2016) <sup>11</sup>. In brief, 80% confluent VeroE6 cells were infected with serially diluted viral  
136 culture supernatant. Subsequently the cells were overlaid with complete methyl cellulose and  
137 maintained in the incubator at 37°C with 5% CO<sub>2</sub>. After the development of the visible plaques  
138 (6-7 days), the plaques were fixed by adding 8% formaldehyde. Later on, the cells were stained  
139 using crystal violet. The number of plaques were counted as plaque forming unit/mL  
140 (PFU/mL).

141

142 **TCID<sub>50</sub> Assay:** Vero E6 cells seeded at 90% confluency in 96-well plates were infected for 1  
143 hr at 37°C with 100 uL of serially diluted (10-fold) virus inoculum in DMEM with 2% FBS. 1  
144 hr post infection the inoculum was aspirated and cells were replenished with fresh media. 3  
145 days post infection the cells were fixed in 4% paraformaldehyde and stained with 1% crystal  
146 violet to determine the cytopathic effect. Median tissue culture infectious dose (TCID<sub>50</sub>) was  
147 determined by the Reed and Muench method <sup>12</sup>.

148

149 **Immunofluorescence Assay:** The immunofluorescence assay was performed according to the  
150 method described by Kim et.al (2013) for the detection of infected cells <sup>13</sup>. The Vero E6 cells  
151 grown on glass cover slips were infected with 0.1 MOI of respective isolates and 48 hr post  
152 infection fixed in 4% paraformaldehyde. Subsequently the cells were permeabilized and  
153 blocked for 1 hr with PBS containing 0.1% TritonX-100 and 3% BSA, followed by incubation  
154 with antibody targeting the SARS-CoV-2 nucleocapsid (Abgenex, cat. No. 11-2003) overnight  
155 at 4°C. After 3x washes with PBS, the cells were stained with the respective Alexa Fluor  
156 conjugated secondary antibody (Invitrogen, Carlsbad, CA), for 1 hr at room temperature  
157 followed by 3x washes with PBS. After the final wash, the coverslips were mounted onto  
158 ProLong Gold Antifade (Invitrogen, Carlsbad, CA). Images were captured under a 100×oil  
159 immersion objective lens using a Leica TCS SP5 Confocal microscope for detection of virus-  
160 infected cells protein.

161 **Western blot analysis:** Immunoblot analysis was carried out as mentioned before<sup>13</sup>. In brief,  
162 cells were lysed in RIPA buffer (20 mM Tris-HCl [pH 7.5], 150 mM NaCl, 50 mM NaF, 1 mM  
163 Na<sub>3</sub>VO<sub>4</sub>, 0.1% SDS, and 0.5% TritonX-100) containing the protease inhibitor cocktail  
164 (Thermo Scientific). The whole cell lysates (WCL) were subjected to SDS-PAGE and  
165 transferred to nitrocellulose membrane (Thermo Scientific) followed by blocking and  
166 immunoblotting with antibodies specific for SARS-CoV-2 spike (Abgenex, cat. No. 10-1007)  
167 and nucleocapsid (Abgenex, cat. No. 11-2003).

168

169 **Micro-neutralization Assay:** Micro neutralization assay was performed as mentioned before  
170 <sup>14</sup>. Briefly, serum samples were heat-inactivated for 60 minutes at 56°C; and syringe filtered  
171 through 0.22 μm. These samples were then two-fold serially diluted in a 96-well plate starting  
172 from 1:10 and then mixed with equal volume of virus solution containing 1000 TCID<sub>50</sub> of  
173 SARS-CoV-2. This serum-virus complex was incubated for 1 hour at 37°C followed by  
174 addition in duplicate to a 96 well plate containing 90% confluent Vero E6 monolayer. The  
175 plates were incubated for 36 hours at 37°C in a humidified atmosphere with 5% CO<sub>2</sub> (Ref 6).  
176 Afterwards, the cells were washed and fixed with 4% paraformaldehyde followed by blocking  
177 with 2% BSA for 1 hr at room temperature. Cells were then incubated with SARS-CoV-2 rabbit  
178 anti-nucleocapsid (Abgenex, cat. No. 11-2003) antibody for 1-2 hour followed by 3x wash with  
179 PBS and 1 hr incubation with horseradish peroxidase-conjugated goat anti-rabbit IgG. After 3x  
180 wash, equal volume of 3,3',5,5'-tetramethylbenzidine substrate was added to each well for 15  
181 minutes with termination of reaction by addition of 2N H<sub>2</sub>SO<sub>4</sub>. The plates were read at 450/620  
182 nm using a microplate reader. The neutralization percentage was determined by following the  
183 formula: each well is 100 – [(X-average of 'no virus' wells)/ (average of 'virus only' wells -  
184 average of 'no virus' wells) \*100], where X is the read for each well. Non-linear regression

185 curve fit analysis over the dilution curve was performed in the Graphpad Prism 5 software  
186 while setting the top and bottom constraints at 100% and 0% <sup>15,16</sup>.

187

188 **Viral Genome sequencing and analysis:** For the whole genome sequencing of the isolated  
189 viruses, the viral RNA amplicon libraries were prepared using the QIAseq FX DNA Library  
190 Kit and the QIAseq SARS-Co V-2 Primer Panel (Qiagen, cat. no. 180475, cat. no. 333896) as  
191 instructed by the manufacturer's manual. The library was sequenced using the Illumina  
192 platform. The adapter sequence used for each sample was compatible with the Illumina  
193 NextSeq 550 instrument with 96-sample configurations (Qiaseq unique dual Y-adapter kit).  
194 The average insert length was in the 250–650 bp range. The raw data pre-processing, alignment  
195 with viral genome, consensus sequence generation, variant calling and phylogenetic analysis  
196 was performed as described by Raghav et al., 2020 <sup>17</sup>.

197

198 **Statistical Analysis:** Statistical analysis was performed using the GraphPad Prism software  
199 version 5. Data were presented as mean  $\pm$  standard deviation (SD). The Non-Linear fit log  
200 (inhibitor) vs. response - Variable slope was used to determine the percentage inhibition of  
201 virus infection due to vaccine-induced antibody-mediated neutralization.

202

## 203 **Results**

204 There is an urgent need to isolate and establish culture of the SARS-CoV-2 circulating viral  
205 strains to aide in research and development towards finding efficient therapeutic modalities  
206 and vaccine development. Hence attempts were made to isolate SARS-CoV-2 virus from  
207 COVID-19 patients oropharyngeal swab samples collected during April-June 2020 at various  
208 location in the state of Odisha, India. The viral RNA obtained from the swab samples was  
209 subjected to whole genome sequencing to identify the viral strain and emerging mutations.  
210 Based on the whole genome sequencing result and cycle threshold values of qRT-PCR swab  
211 samples were chosen, which were expected to have high viral load and of respective clades  
212 19A, 19B, 20A & 20B for virus isolation and propagation.

213 Virus isolation was carried out using the protocol adapted by Harcourt et al, 2020 with minor  
214 modification. Based on previous reports Vero-E6 cells were used for virus propagation <sup>9</sup>. All  
215 the five isolates were passaged for ten times on Vero-E6 cells and the culture supernatants were  
216 collected during every passage and a portion of clarified supernatant was used as inoculum for  
217 subsequent passage. The 10<sup>th</sup> passage clarified supernatant was used as viral stock for the whole  
218 genome sequencing, virus characterization, and further experiments. During the passages,  
219 RNA isolated from the collected supernatants was subjected to qRT-PCR to confirm the  
220 presence of SARS-CoV-2. Viral titres in the 10<sup>th</sup> passage supernatant were determined by  
221 standard plaque (**Figure 1A**) and TCID<sub>50</sub> assays (**Figure 1B**). The viral titres of the respective  
222 isolates ranged from the 10<sup>6</sup> to 10<sup>8</sup>/mL. Based on the titres obtained, the Vero-E6 cells were  
223 infected with 0.1 MOI of all isolates for subsequent experiments. To visualize the cytopathic  
224 effect (CPE) bright field images were captured at 48 hr post infection. All the five isolates  
225 displayed significant amount of virus induced CPE however ILS03 belonging to 20A clade  
226 displayed highest level of CPE among the five and the other four displayed nearly similar levels

227 of CPE (**Figure 1C**). Absolute quantification of viral genome copies in the culture supernatant  
228 collected at 48 hr post infection was determined by qRT-PCR using gene specific primers and  
229 probes for nucleocapsid and ORF1 (**Figure 1D**). Viral gene expression was also confirmed by  
230 Western blot analysis of the cell lysates using antibodies targeting SARS-CoV-2 spike and  
231 nucleocapsid (Figure 1E). Cells infected with all 5 isolates showed profound level of viral gene  
232 expression as adjudged by Western blot analysis. To determine the level of infectivity or any  
233 isolate specific variation in subcellular infection pattern immunofluorescence assay was  
234 performed in Vero-E6 cells infected with the respective isolates at 0.1 MOI for 48 hours. No  
235 significant variation was observed in the subcellular distribution of the SARS-CoV2  
236 nucleocapsid protein and all the isolates displayed reticular cytoplasmic staining across the  
237 entire cytoplasm (**Figure 1 F**). Quantification of the percentage of infected cells showed that  
238 around 70-90% of cells were infected at 48 hours post infection with the respective isolates  
239 using 0.1 MOI (**Figure 1 G**).

240 To access the relative differences in the kinetics of viral gene expression, time kinetics  
241 experiment was conducted by infecting Vero-E6 cells at MOI of 0.1 and collecting cells at  
242 every 4 hours interval for 24 hrs. Western blot analysis of the cell lysates for spike and  
243 nucleocapsid proteins of SARS-CoV-2 showed that in isolates ILS01, ILS02, & ILS03,  
244 nucleocapsid expression is noticeable from the 16th hour post infection, whereas in isolates  
245 ILS15 and ILS24, it appears from 12th hour onwards (**Figure 2**). Interestingly, spike protein  
246 expression was evident only after 16th hours post infection in all five isolates (**Figure 2**). To  
247 further access the specific variations between the isolates in virus mediated cytotoxicity and  
248 viral replication kinetics, Vero E6 cells were infected at 0.1 MOI with respective isolates and  
249 the cell culture supernatants collected every 12 hours upto 60 hours post infection to estimate  
250 cytotoxicity and viral release. Based on the LDH levels in the supernatants, it appears that  
251 isolates ILS01, ILS02, ILS15 & ILS24 induce around 30% of cytotoxicity with respect to mock  
252 at 48 hr post infection, whereas isolate ILS03 induces around 90% of cytotoxicity (**Figure 3A-**  
253 **3E**). Quantification of viral genome copies in the culture supernatants suggest a steady increase  
254 in the genome copies from 12 to 36 hr post infection indicating that there is an exponential  
255 increase in the release of viral particle upto 36 hrs post infection followed by plateau (**Figure**  
256 **3F**).

257 Further the susceptibility of various cell lines was assessed towards isolates to decipher isolate  
258 specific variations in cell susceptibility. Various cell lines were infected with the respective  
259 isolates at 0.1 MOI and culture supernatants were collected at 24 hrs post infection (hpi) to  
260 quantify the viral genome copies. The human hepatoma cell line (Huh-7), which is highly  
261 susceptible to Dengue, Chikungunya, and Hepatitis C viruses (HCV), was found to be more or  
262 less equally susceptible to all the five isolates (**Figure 4A**). Similarly, CaCo2 cell line, which  
263 is a human intestinal epithelial cell line that has been shown by various groups to be permissive  
264 to SARS-CoV-2 was also found to be susceptible to all the five isolates (**Figure 4B**). However,  
265 the isolate ILS01 was found to be less infectious compared to the other isolates. Similarly,  
266 HEK-293T cells (a human kidney cell line) was found to be more permissive to isolate ILS01,  
267 ILS02, ILS15 & ILS 24 as compared to isolate ILS03 (**Figure 4C**). Immune cells  
268 predominantly show selective susceptibility to the viruses. Surprisingly, in our study, we found  
269 that the human monocyte cells THP-1 and murine macrophage cell line RAW 264.7 were  
270 permissive to all the SARS-CoV-2 isolates (**Figure 4D and 4E**).

271 To decipher any clade specific variations towards neutralization, the neutralization capacity  
272 and protection of the vaccine-induced antibodies against the respective isolates was  
273 determined. Neutralizing antibody levels predict vaccine efficacy and immune protection. In  
274 India, initially only two vaccines, Covaxin and Covishield were given emergency approval and  
275 used in Government run COVID-19 vaccination drive. We used vaccinated sera from Covaxin  
276 and Covishield vaccinated healthy individuals with no history of SARS-CoV-2 infection. The  
277 sera were collected after completion of the 2<sup>nd</sup> vaccine dose fifteen days post 2<sup>nd</sup> vaccine dose.  
278 Horse sera was used as negative control as it was difficult to obtain age-matched healthy control  
279 sera from individuals who had not been vaccinated or exposed to COVID-19. The micro-  
280 neutralization assay suggested that both the vaccine was equally effective against all of the  
281 isolates. Nearly 100% neutralization was observed at 1:10 dilution, which declined to ~50% at  
282 dilutions 1:160 or higher (**Figure 5**).

283 The whole genome sequencing of culture adapted viral isolates and viral genome from patient  
284 oropharyngeal swab sample suggested that repetitive passaging of SARS-CoV2 virus in Vero-  
285 E6 cells did not lead to emergence of many mutations during the adaptation in cell culture. The  
286 number of viral gene mutations found in the source swab samples and isolated viruses in  
287 comparison to the Wuhan reference strain is shown in **Table 3**. Comparative analysis of  
288 common and unique sequence mutation between the source sample and isolate (**Table 4**) and  
289 mutational plot analysis of non-synonymous mutations (**Figure 6**) suggests that during the  
290 culture adaptation very minimal changes occurred. ILS01 isolated from source sample of  
291 clade19A gained only one mutation (A23014C) in spike gene during cell culture adaptation,  
292 while it retained all other ten mutations found in source swab samples. Isolate ILS24 obtained  
293 from source samples of clade 19B gained three mutations (C2143T, C10138T, C10702T) in  
294 the ORF1ab and one mutation (G28326T) in the N genes during adaptation. It retained 5  
295 mutations found in the source swab sample material, and one reversion (G26730T) to Wuhan  
296 reference strain in the M gene. ILS03 isolated from swab sample of clade 20A retained 9  
297 mutations found in swab sample and gained one mutation each in ORF1ab (G19514T) and S  
298 (A24538C) genes during adaptation. Interestingly during isolation and adaptation of ILS15  
299 from swab sample of clade 20B, five reversions occurred, which included two (C8917T,  
300 G9389A) in ORF1ab and three (G28882A, G28881A, G28883C) in N gene resulting in the  
301 reclassification of the cell culture adapted strain ILS15 in clade 20A. To understand the  
302 evolution of the virus and trace lineage phylogenetic network analysis was performed using  
303 the genome sequence of the four isolates and 33 other largely complete sequences of SARS-  
304 CoV-2 genome from different regions of the world. Phylogenetic analysis indicated that the  
305 genome sequence of the swab sample and culture adapted viruses remain identical as they  
306 cluster close together in the respective clades (**Figure 7**), which was also in agreement with the  
307 mutational plot analysis evident by the presence of similar nonsynonymous mutation  
308 throughout respective genomes (**Figure 6**). Both the swab sample and adapted virus of isolates  
309 ILS01& ILS24 closely clustered together with the Wuhan reference strain as they belong to  
310 very early clade 19A & 19B respectively. Swab sample in case of isolate ILS15 cluster together  
311 with viral genome from India & Brazil belonging to clade 20B whereas the adapted virus strain  
312 cluster together with the genome sequences from Australia and South Korea of clade 20A  
313 which may be due the 5 reversions found in the adapted virus. Interestingly, in case of isolate  
314 ILS03 both the swab sample and adapted virus strain extended out and clustered separately  
315 from the other viral genome used in this analysis.



316

## 317 **Discussion:**

318 In the prevailing pandemic state, it is important to isolate and characterize the disease-causing  
319 pathogen to facilitate development of therapeutic strategies and vaccine candidates. Therefore,  
320 in this study we have isolated and characterized five circulating local strains of SARS-CoV-2  
321 as limited COVID-19 resources were available in India to aide in research and development.

322 As done by other groups Vero-E6 cells were used for the isolation of SARS-CoV-2 viruses  
323 <sup>18,19</sup>. We observed a robust virus-induced cytopathic effect from 5<sup>th</sup> passage onwards similar to  
324 previous reports <sup>20</sup>. The viral titres were around  $1 \times 10^6$  TCID<sub>50</sub> /ml in final passages for all the  
325 isolates (**Figure 1A & 1B**) similar to the titres reported by other groups <sup>21,22</sup>. Subsequent  
326 infection with the isolated viruses leads to robust infection in Vero-E6 cells, which was evident  
327 by exponential increase in virus release from 12-36 hours post infection and detection of  
328 infection in 80-100% of Vero-E6 cells, 48 hours post infection. In agreement with studies from  
329 other labs the isolates of the current study also showed infectivity in various cell lines ranging  
330 from primate to human epithelial & immune cells. The immune cells have been shown to  
331 display selective susceptibility to some viruses. For example the THP-1 monocyte cells are not  
332 permissive to HCV and Chikungunya viruses <sup>23,24</sup>, whereas they permissive to Dengue virus  
333 <sup>25</sup>. In this study it was found that the viral replication levels of all the isolates were nearly  
334 similarly in immune cells in comparison to the cells of epithelial lineage. Although the viral  
335 growth kinetics was similar between ILS03 and other isolates, ILS03 displayed 2 fold higher  
336 cytopathic effect compared to other isolates suggesting that the high CPE observed with ILS03  
337 might be due to unique characteristics of ILS03 and not due to mere high viral load (**Figure 3**).  
338 However, further studies are warranted to characterize mechanism specific to ILS03-mediated  
339 CPE and decipher isolate-specific variations in host-virus interactions. Our current  
340 observations suggest that all the five isolates belonging to the four different clades showed  
341 almost similar virus growth characteristics despite the genomic variations between the clades  
342 suggesting that the adaptive evolution occurring in the natural host may not be applicable to  
343 growth *in-vitro* in cells highly permissive to viral infections.

344 In natural environment SARS-CoV-2 evolves at an estimated nucleotide substitution rate  
345 ranging between  $10^{-3}$  and  $10^{-4}$  substitutions per site per year <sup>26</sup> which is a very slow mutational  
346 rate. However, the rapid emergence of SARS-CoV2 variants has been speculated to have  
347 happened in chronically infected immunosuppressed patients with high levels of viral  
348 replication for extended periods under conditions of challenge with treatment modalities like  
349 transfusion of convalescent plasma or broadly neutralizing monoclonal <sup>27</sup> driving the selection  
350 of variants that evade antibody responses. However, the high prevalence of SARS-CoV2  
351 during the past years and the rampant growth in the human host may have also contributed to  
352 mutational variability among circulating viruses. In natural host due to higher barrier towards  
353 infection, the viruses evolve and variants with higher replicative fitness get selected over time,  
354 however in *in vitro* cell cultures using highly permissive cell lines the barrier against viral  
355 replication is very low which may not favour rapid evolution of viral variants. In correlation,  
356 minimal number of mutations were observed in the adapted viruses as compared to their source  
357 swab sample even after 10<sup>th</sup> passage (**Table 4, Figure 6**) suggesting that *in-vitro* cultured  
358 viruses are highly stable.

359 The five isolates used in this study belong to the four clades (19A, 19B, 20A, & 20B) with the  
360 clades 20A & B harbouring the D614G mutation in spike protein which has been suggested to  
361 promote higher infectivity and transmission<sup>17</sup>. The observations of the current study suggest  
362 that the two vaccines, Covaxin and Covishield are equally effective and offer protection against  
363 these viral isolates from samples collected during the 1<sup>st</sup> wave of COVID-19 in Odisha, India.  
364 The Covaxin is a whole inactivated virus (strain NIV 2020-770) and Covishield (Chimpanzee  
365 Adenovirus encoding the SARS-CoV-2 spike glycoprotein (ChAdOx1-S) based on the early  
366 viral isolates closer to the Wuhan strain. However, during the 2<sup>nd</sup> wave many new variants were  
367 emerged across the world and they escaped neutralization by antibodies induced by vaccines  
368 based on early isolates. Majority of the neutralizing antibodies found in convalescent sera target  
369 the spike and RBD domain of spike<sup>28,29</sup>, therefore many organizations have adapted the  
370 strategy of developing vaccine candidates based on Spike protein. However, further studies are  
371 warranted to evaluate the efficacy of vaccines based on whole inactivated viruses and other the  
372 antigenic motifs other than spike as they can induce a broad antibody response that may be  
373 effective against the spike variants. Use of vaccine cocktails may also be an effective strategy  
374 to overcome the burden of vaccine escaping viral variants. In agreement, recent evidence  
375 suggests that heterologous prime-boost vaccination strategy is more effective alternative than  
376 homologous prime-boost vaccination strategy against the emerging variants<sup>30</sup>.

377 In summary, in the current investigation virus cultures of five SARS-CoV-2 strains belonging  
378 to various clades were established from the laboratory-confirmed SARS-CoV-2-infected  
379 patients and their growth kinetics and genome sequences were characterized. Further studies  
380 are required to clearly elucidate the strain specific variation among the isolates. These isolates  
381 will be highly useful resource to facilitate research and development in the field of coronavirus  
382 biology and COVID-19.

383

384 **Acknowledgement:** The authors acknowledge the support of the Institute of Life sciences in  
385 conducting these studies and acknowledge the support staff involved in BSL3 maintenance,  
386 swab sample collection and processing. The authors acknowledge the financial support from  
387 DBT-ILS. SaC acknowledges CSIR for her fellowship. GHS acknowledges the Intermediate  
388 Fellowship from the DBT-Wellcome Trust India Alliance (IA/I/15/1/501826).

389

### 390 **References:**

- 391 1 Zhou P, Yang X-L, Wang X-G *et al.* A pneumonia outbreak associated with a new  
392 coronavirus of probable bat origin. *Nature* 2020; **579**: 270–273.
- 393 2 Wu F, Zhao S, Yu B *et al.* A new coronavirus associated with human respiratory disease  
394 in China. *Nature* 2020; **579**: 265–269.
- 395 3 Zehender G, Lai A, Bergna A *et al.* Genomic characterization and phylogenetic analysis  
396 of SARS-COV-2 in Italy. *J Med Virol* 2020; **92**: 1637–1640.
- 397 4 WHO (World Health Organization) Weekly epidemiological update on COVID-19 - 26  
398 October 2021. [https://www.who.int/emergencies/diseases/novel-coronavirus-](https://www.who.int/emergencies/diseases/novel-coronavirus-2019/situation-reports)  
399 [2019/situation-reports.](https://www.who.int/emergencies/diseases/novel-coronavirus-2019/situation-reports) 2021.  
400 [https://www.who.int/emergencies/diseases/novel-](https://www.who.int/emergencies/diseases/novel-coronavirus-2019/situation-reports)  
[coronavirus-2019/situation-reports.](https://www.who.int/emergencies/diseases/novel-coronavirus-2019/situation-reports)

- 401 5 Petrosillo N, Viceconte G, Ergonul O, Ippolito G, Petersen E. COVID-19, SARS and  
402 MERS: are they closely related? *Clin Microbiol Infect Off Publ Eur Soc Clin Microbiol*  
403 *Infect Dis* 2020; **26**: 729–734.
- 404 6 Michel CJ, Mayer C, Poch O, Thompson JD. Characterization of accessory genes in  
405 coronavirus genomes. *Virology* 2020; **17**: 131.
- 406 7 Jin Z, Du X, Xu Y *et al.* Structure of M(pro) from SARS-CoV-2 and discovery of its  
407 inhibitors. *Nature* 2020; **582**: 289–293.
- 408 8 Li Y-D, Chi W-Y, Su J-H, Ferrall L, Hung C-F, Wu T-C. Coronavirus vaccine  
409 development: from SARS and MERS to COVID-19. *J Biomed Sci* 2020; **27**: 104.
- 410 9 Harcourt J, Tamin A, Lu X *et al.* Isolation and characterization of SARS-CoV-2 from  
411 the first US COVID-19 patient. *bioRxiv Prepr. Serv. Biol.* 2020.  
412 doi:10.1101/2020.03.02.972935.
- 413 10 Kumar S, Singh B, Kumari P *et al.* Identification of multipotent drugs for COVID-19  
414 therapeutics with the evaluation of their SARS-CoV2 inhibitory activity. *Comput Struct*  
415 *Biotechnol J* 2021; **19**: 1998–2017.
- 416 11 Mishra P, Kumar A, Mamidi P *et al.* Inhibition of Chikungunya Virus Replication by 1-  
417 [(2-Methylbenzimidazol-1-yl) Methyl]-2-Oxo-Indolin-3-ylidene] Amino  
418 Thiourea(MBZM-N-IBT). *Sci Rep* 2016; **6**: 20122.
- 419 12 REED LJ, MUENCH H. A SIMPLE METHOD OF ESTIMATING FIFTY PER CENT  
420 ENDPOINTS. *Am J Epidemiol* 1938; **27**: 493–497.
- 421 13 Kim S-J, Syed GH, Siddiqui A. Hepatitis C virus induces the mitochondrial translocation  
422 of Parkin and subsequent mitophagy. *PLoS Pathog* 2013; **9**: e1003285.
- 423 14 Zhao H, Xu K, Jiang Z *et al.* A neuraminidase activity-based microneutralization assay  
424 for evaluating antibody responses to influenza H5 and H7 vaccines. *PLoS One* 2018;  
425 **13**: e0207431.
- 426 15 Manenti A, Maggetti M, Casa E *et al.* Evaluation of SARS-CoV-2 neutralizing  
427 antibodies using a CPE-based colorimetric live virus micro-neutralization assay in  
428 human serum samples. *J Med Virol* 2020; **92**: 2096–2104.
- 429 16 Amanat F, White KM, Miorin L *et al.* An In Vitro Microneutralization Assay for SARS-  
430 CoV-2 Serology and Drug Screening. *Curr Protoc Microbiol* 2020; **58**: e108.
- 431 17 Raghav S, Ghosh A, Turuk J *et al.* Analysis of Indian SARS-CoV-2 Genomes Reveals  
432 Prevalence of D614G Mutation in Spike Protein Predicting an Increase in Interaction  
433 With TMPRSS2 and Virus Infectivity. *Front Microbiol* 2020; **11**: 594928.
- 434 18 Banerjee A, Nasir JA, Budyłowski P *et al.* Isolation, Sequence, Infectivity, and  
435 Replication Kinetics of Severe Acute Respiratory Syndrome Coronavirus 2. *Emerg*  
436 *Infect Dis* 2020; **26**: 2054–2063.
- 437 19 Caccuri F, Zani A, Messali S *et al.* A persistently replicating SARS-CoV-2 variant  
438 derived from an asymptomatic individual. *J Transl Med* 2020; **18**: 362.
- 439 20 Park WB, Kwon NJ, Choi SJ *et al.* Virus Isolation from the First Patient with SARS-  
440 CoV-2 in Korea. *J Korean Med Sci* 2020; **35**: e84.
- 441 21 Harcourt J, Tamin A, Lu X *et al.* Severe Acute Respiratory Syndrome Coronavirus 2

- 442 from Patient with Coronavirus Disease, United States. *Emerg Infect Dis* 2020; **26**:  
443 1266–1273.
- 444 22 Brandolini M, Taddei F, Marino MM *et al.* Correlating qRT-PCR, dPCR and Viral  
445 Titration for the Identification and Quantification of SARS-CoV-2: A New Approach  
446 for Infection Management. *Viruses* 2021; **13**. doi:10.3390/v13061022.
- 447 23 Sourisseau M, Schilte C, Casartelli N *et al.* Characterization of reemerging chikungunya  
448 virus. *PLoS Pathog* 2007; **3**: e89.
- 449 24 Revie D, Salahuddin SZ. Role of macrophages and monocytes in hepatitis C virus  
450 infections. *World J Gastroenterol* 2014; **20**: 2777–2784.
- 451 25 Tsai T-T, Chuang Y-J, Lin Y-S *et al.* Antibody-dependent enhancement infection  
452 facilitates dengue virus-regulated signaling of IL-10 production in monocytes. *PLoS*  
453 *Negl Trop Dis* 2014; **8**: e3320.
- 454 26 van Dorp L, Richard D, Tan CCS, Shaw LP, Acman M, Balloux F. No evidence for  
455 increased transmissibility from recurrent mutations in SARS-CoV-2. *Nat Commun*  
456 2020; **11**: 5986.
- 457 27 Kemp SA, Collier DA, Datir RP *et al.* SARS-CoV-2 evolution during treatment of  
458 chronic infection. *Nature* 2021; **592**: 277–282.
- 459 28 Almejdi AM, Khoder G, Alchakee AS, Alsayyid AT, Sarg NH, Soliman SSM. SARS-  
460 CoV-2 spike protein: pathogenesis, vaccines, and potential therapies. *Infection* 2021; **49**:  
461 855–876.
- 462 29 Klingler J, Lambert GS, Itri V *et al.* SARS-CoV-2 mRNA vaccines induce a greater  
463 array of spike-specific antibody isotypes with more potent complement binding capacity  
464 than natural infection. *medRxiv Prepr. Serv. Heal. Sci.* 2021.  
465 doi:10.1101/2021.05.11.21256972.
- 466 30 Nordström P, Ballin M, Nordström A. Effectiveness of heterologous ChAdOx1 nCoV-  
467 19 and mRNA prime-boost vaccination against symptomatic Covid-19 infection in  
468 Sweden: A nationwide cohort study. *Lancet Reg Heal Eur* 2021; : 100249.
- 469

## Figure 1

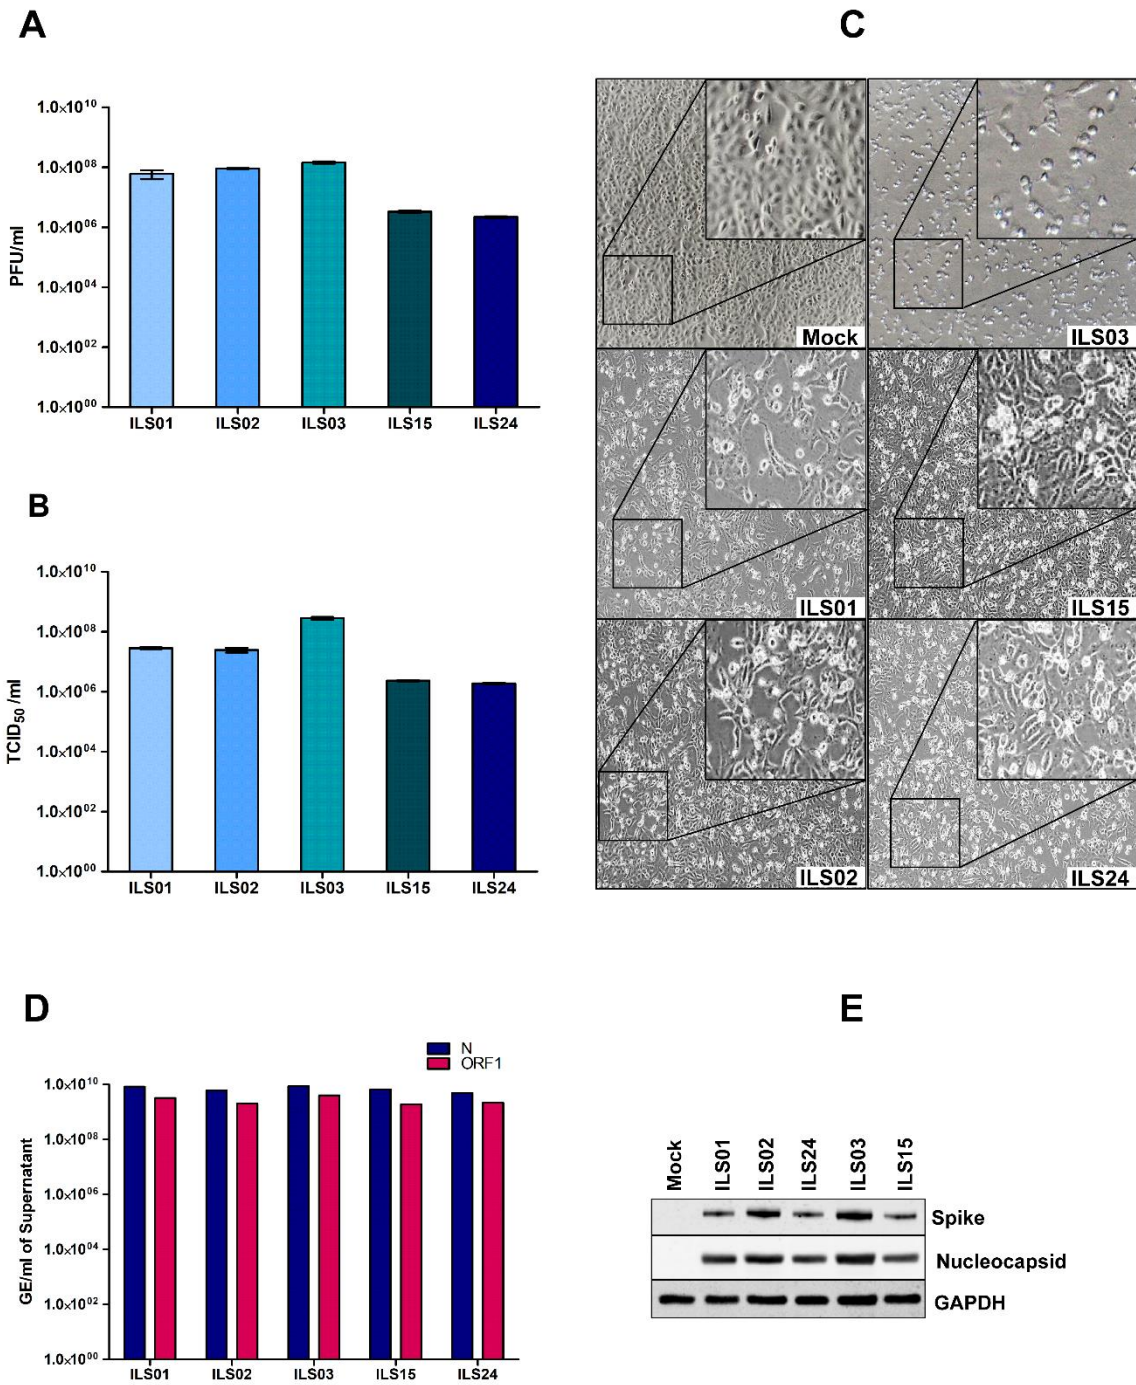

## Figure1 cont

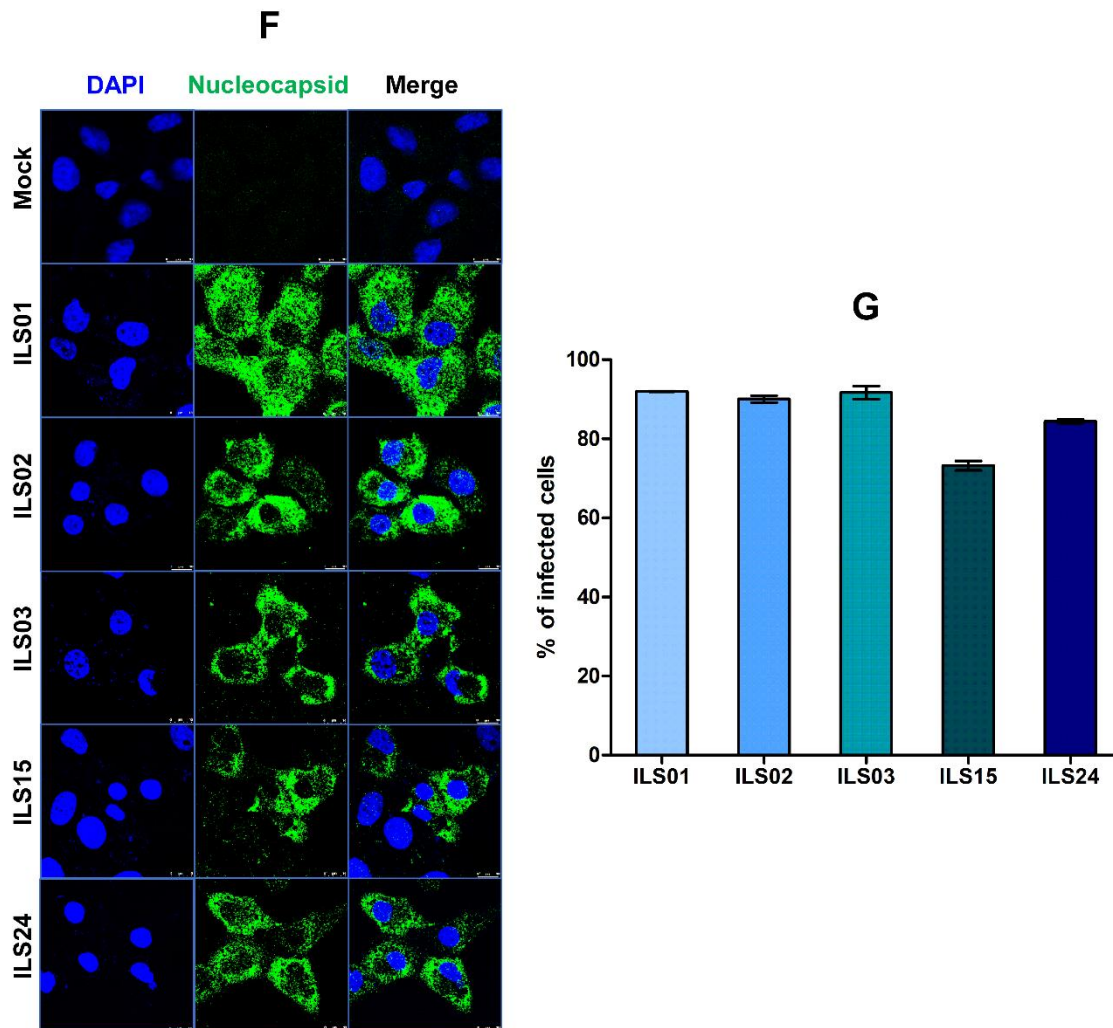

471

472 **Figure 1: Characterization of isolated SARS-CoV2 circulating strains.** The SARS-CoV2  
473 circulating strains were isolated from the COVID-19 patients swab samples through sequential  
474 passage in Vero E6 cells as described in materials & methods. The viral titres, cytopathic effect  
475 and gene expression was determined in the 10<sup>th</sup> passage viral stocks. Quantification of viral  
476 titres of the five isolates by plaque forming unit (PFU) assay (A) and TCID<sub>50</sub> assay (B). Bright  
477 field images depicting cytopathic effect in Vero E6 cells infected respectively with the five  
478 isolates (C). Absolute quantification of viral genome copies in all five isolates using gene-  
479 specific primer and probes targeting SARS-CoV2 nucleocapsid and ORF-1 gene (D). Western  
480 blot analysis of infected Vero E6 cell lysates with antibodies against SARS-CoV2 spike and  
481 nucleocapsid (E). GAPDH was used as protein loading control. Immunofluorescence detection

482 of SARS-CoV-2 infected cells using antibody against SARS-CoV2 nucleocapsid in Vero E6  
483 cells infected with 0.1 MOI of respective isolates (F) and quantification of the percentage of  
484 infection 48 hr post infection (G).

**Figure 2**

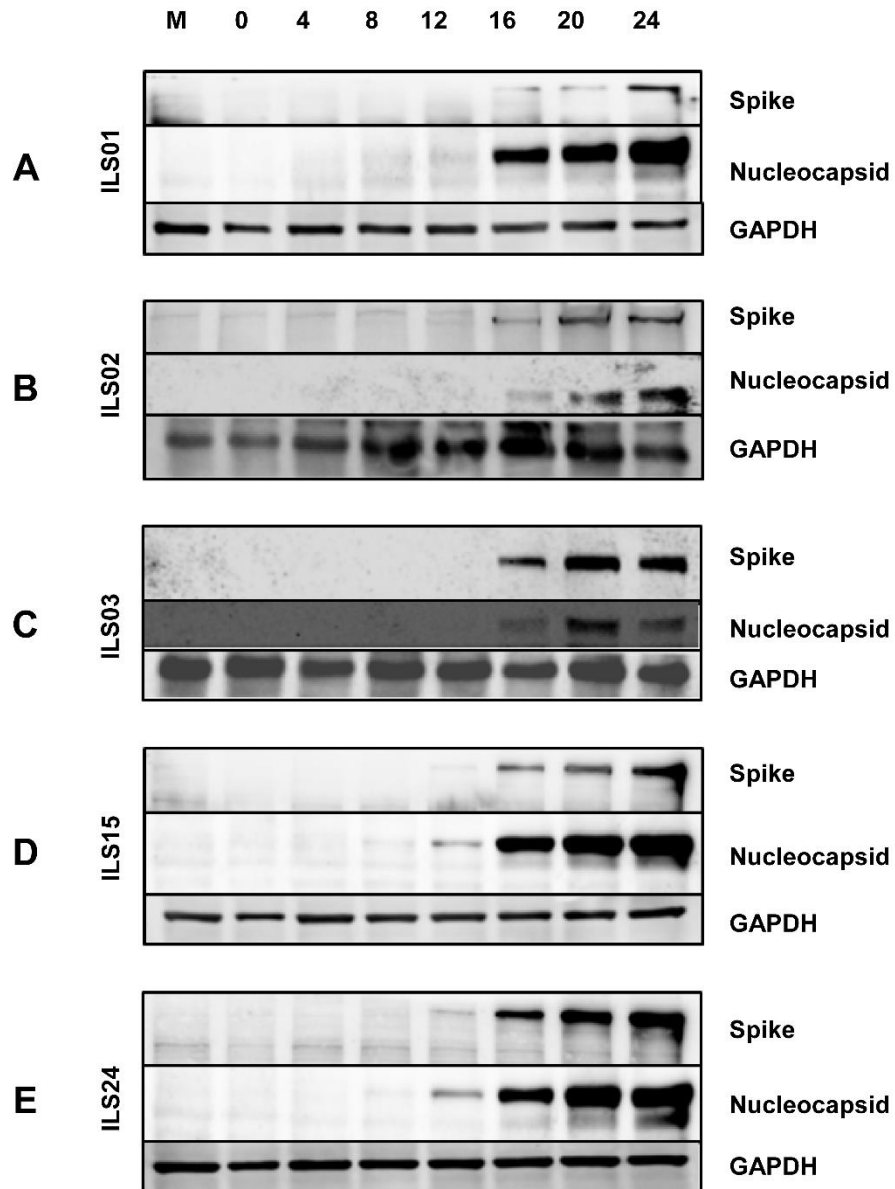

485

486

487 **Figure 2: Time kinetics of viral gene(s) expression.** Vero E6 cells infected with respective  
488 isolates of SARS-CoV2 were collected at indicated time points post infection. Cell lysates were  
489 subjected to Western blot analysis with antibodies against SARS-CoV2 spike and nucleocapsid  
490 proteins. GAPDH was used as an internal loading control.



**Figure 3**

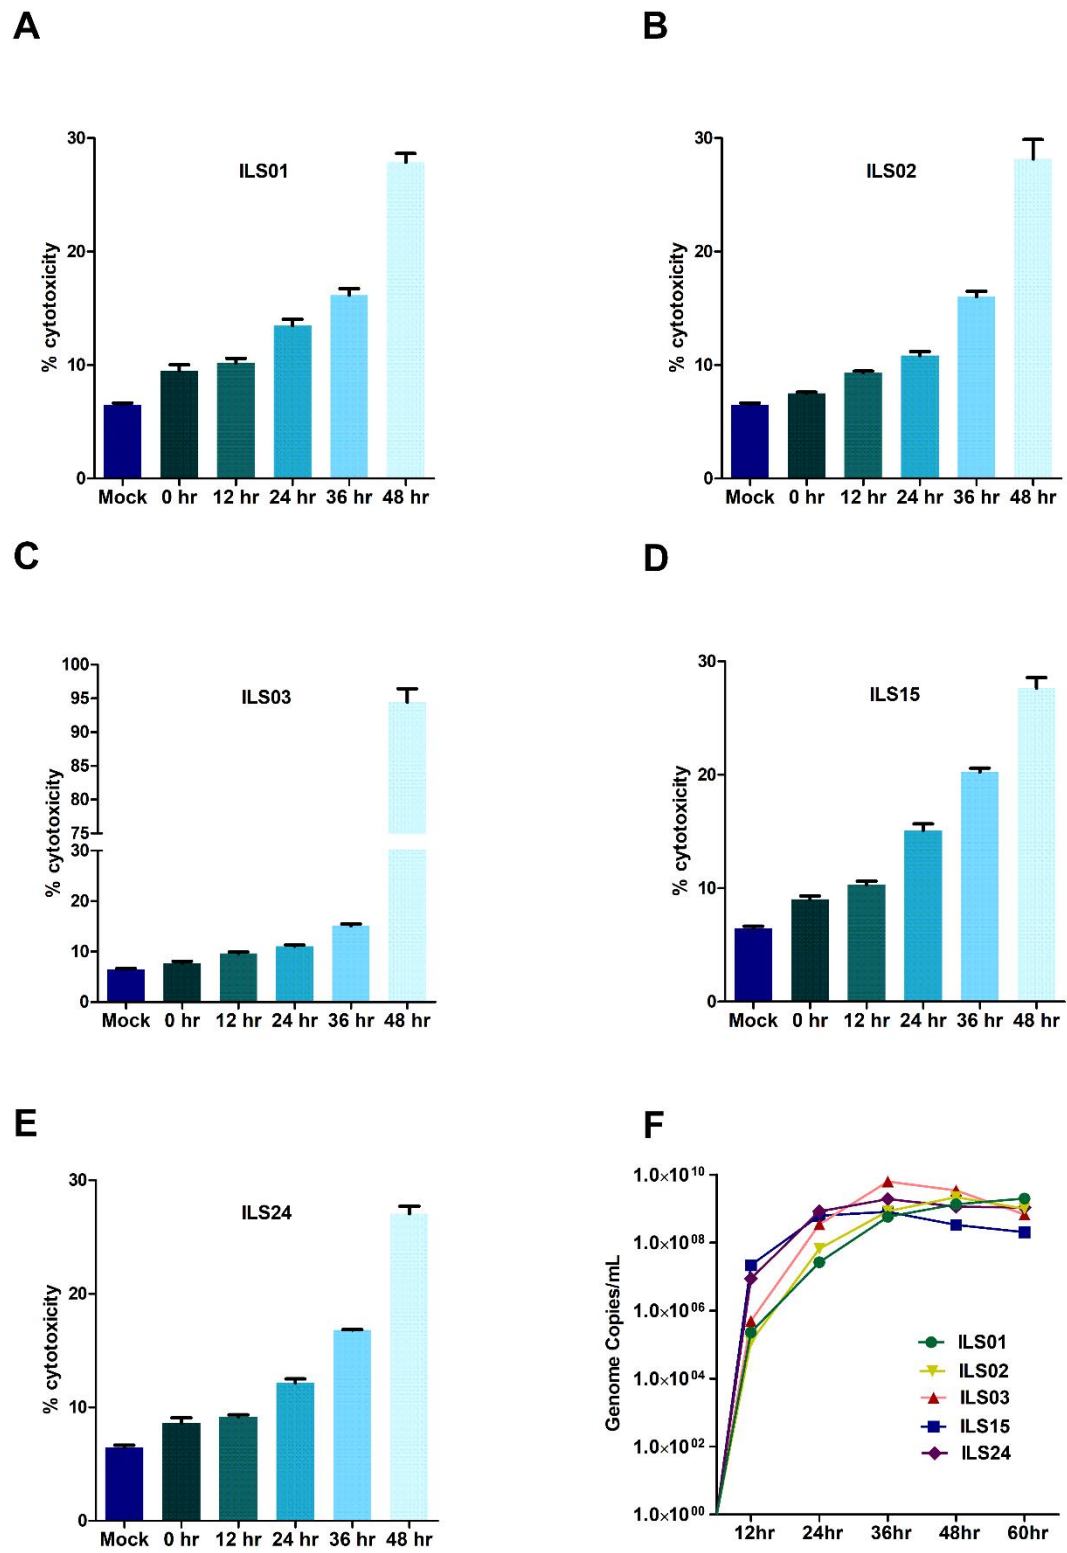

491

492

493 **Figure 3: Viral cytopathy and growth kinetics.** Infection associated cytopathy was  
494 determined by calculating LDH release as described in materials & methods. (A-E) Graph  
495 depicting percentage of cytotoxicity in the infected Vero E6 cells at respective time points post  
496 infection. (F) Line plot showing time-dependent increase in the viral genome copies in culture  
497 supernatants determined by absolute quantification of viral genome.

**Figure 4**

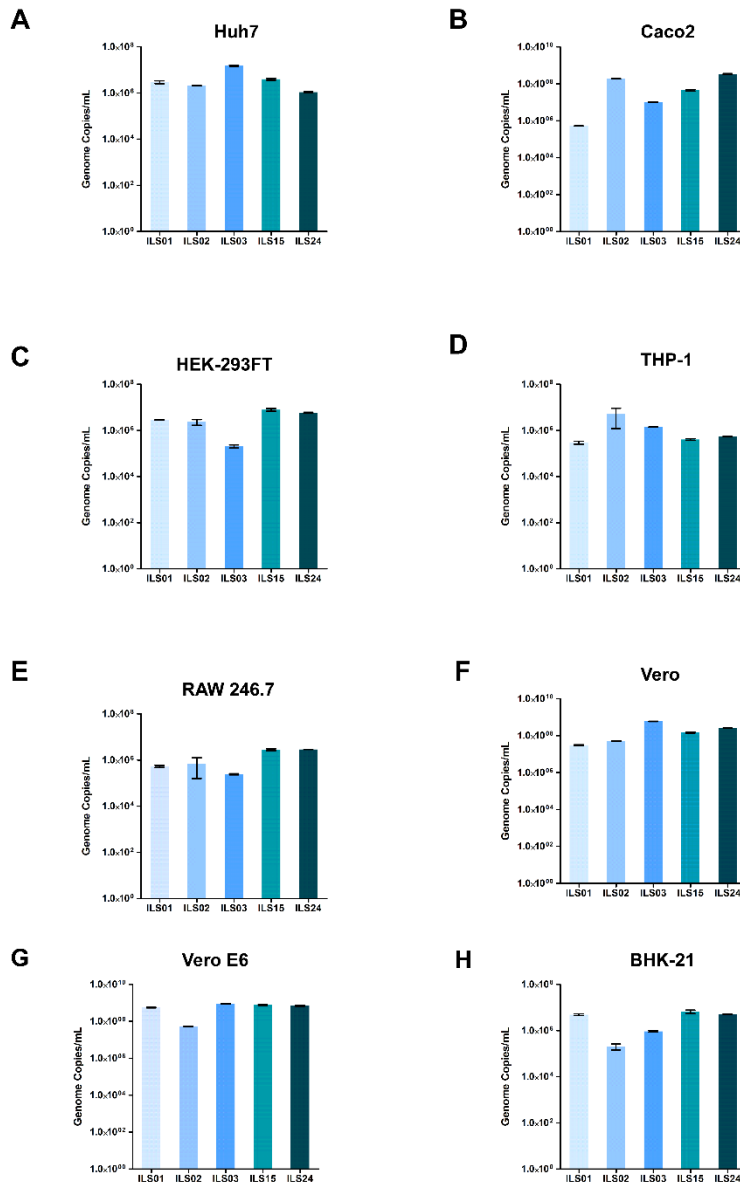

498

499

500 **Figure 4: Susceptibility of various cell lines to the SARS-CoV2 isolates.** Different cell lines  
501 were subjected to infection with 0.1 MOI of respective isolates. 24h post infection the viral  
502 load in the culture supernatants was determined by absolute quantification of viral genome  
503 copies. Graphs depicting the viral copies per ml supernatant in Huh7 (A), Caco2 (B), HEK  
504 293T (C), THP1 (D), RAW 264.7 (E), Vero (F), Vero E6 (G), and BHK-21 (H).

505

Figure 5

A

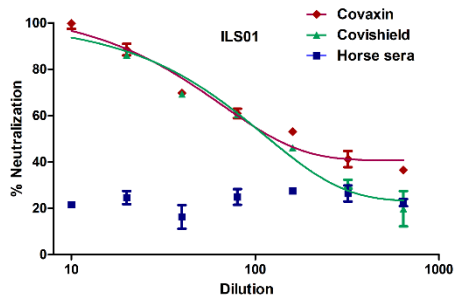

B

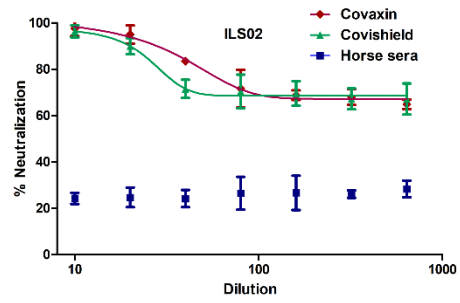

C

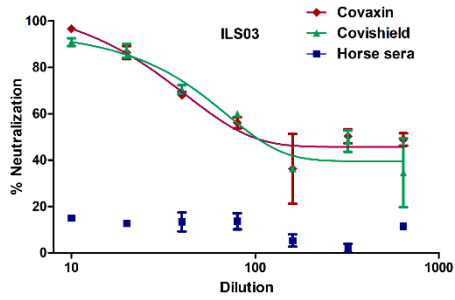

D

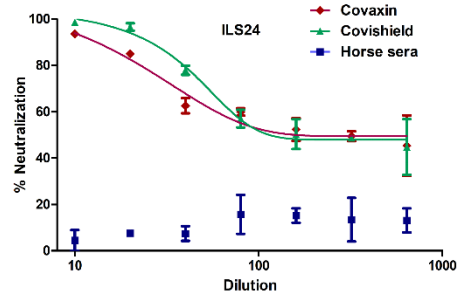

E

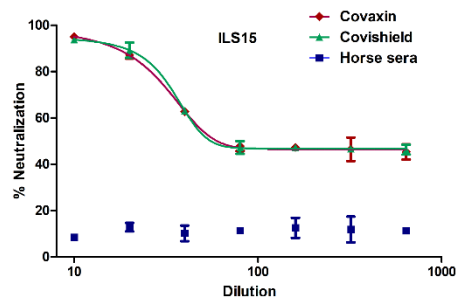

506

507

508 **Figure 5: Neutralization potential of sera obtained from vaccinated individuals:** The  
 509 respective isolates were subjected to micro-neutralization assay using the sera obtained from  
 510 Covaxin and Covishield vaccinated individuals to determine the neutralization potential of the  
 511 post vaccination sera against the respective isolates. The dose-response curves were fitted using  
 512 a nonlinear regression model using the GraphPad software Prism 5. (A-E) Neutralization  
 513 efficiency of the respective vaccinated sera against the 5 isolates. Horse sera was used as  
 514 negative control.

**Figure 6**

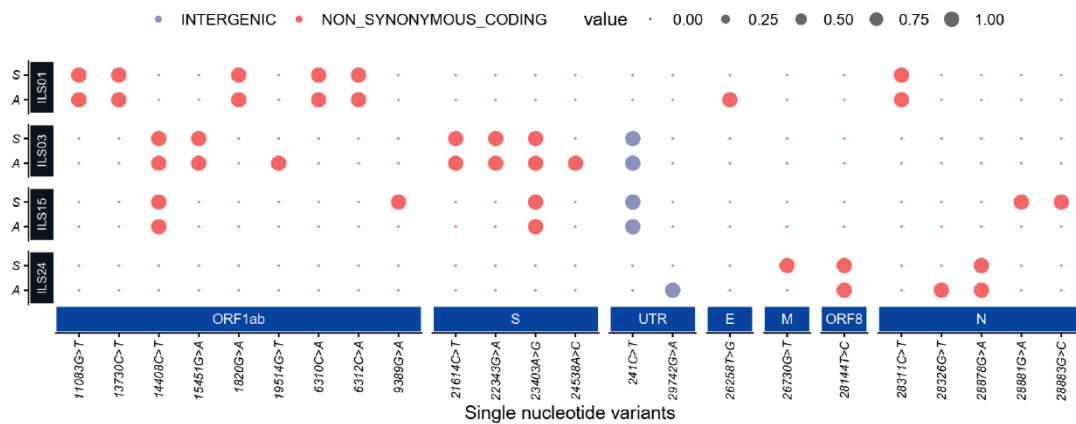

515 **Figure 6: Mutation plot of the isolates and source swab samples:** Dot plot representing high  
 516 quality single nucleotide nonsynonymous and intergenic variant (SNV) present in the initial  
 517 viral RNA isolated from patients swab samples (denoted as S) and viral RNA from culture  
 518 adapted isolates (denoted as A). The large dot represents the presence of a SNV in the  
 519 represented sample coloured by their functional annotations (grey for intergenic, red for non-  
 520 synonymous SNVs).  
 521

Figure 7

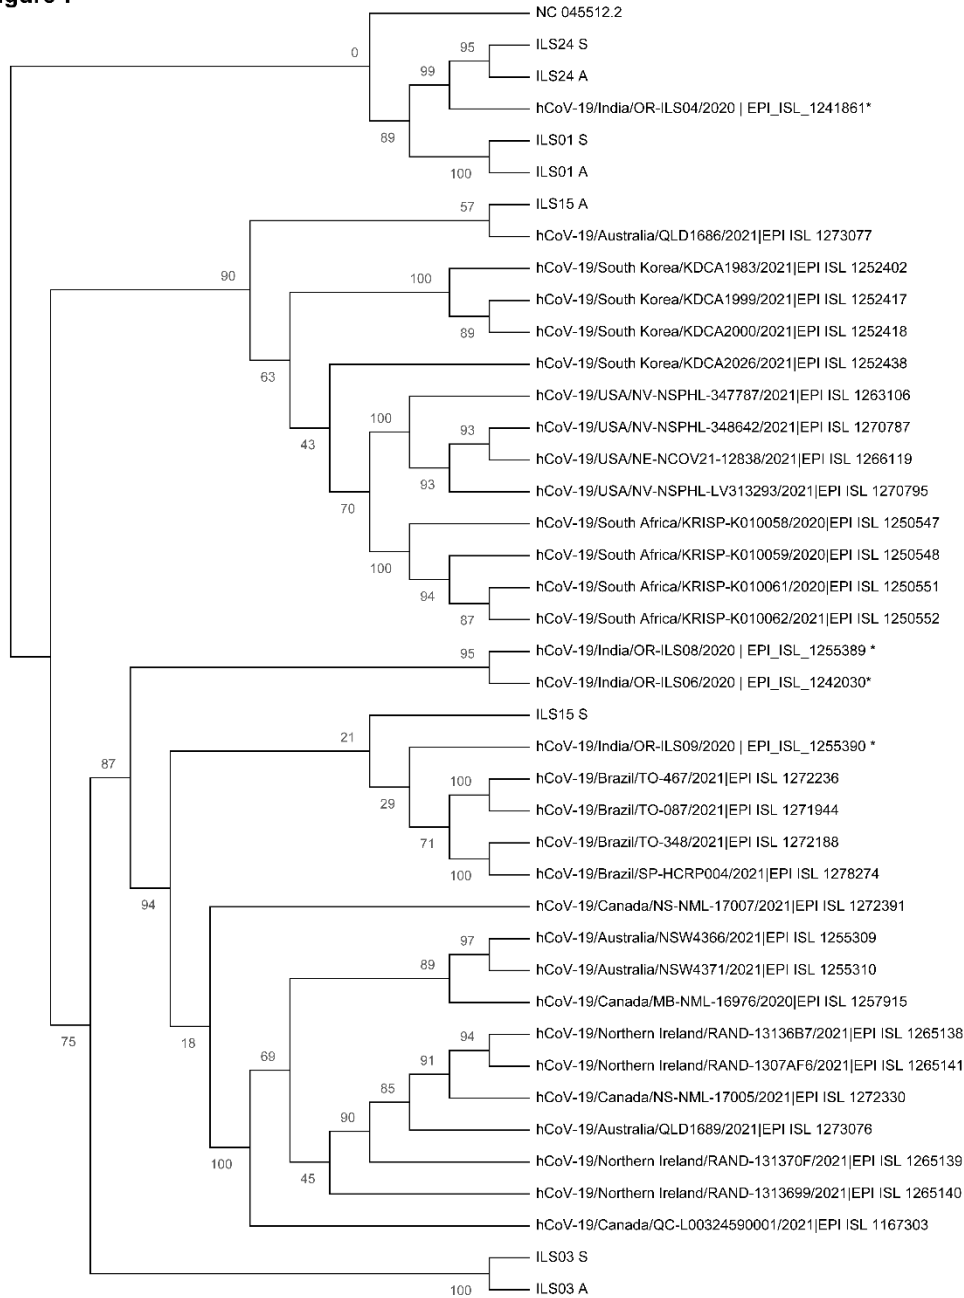

522

523

524 **Figure 7: Phylogenetic network analysis of the isolated viruses:** Maximum likelihood (ML)

525 tree of studied viral sequences in combination with 33 SARS-CoV2 genome sequences

526 representing from different countries around the globe including four sequences from Odisha

527 India. Bootstrap (n =1000) values are represented as branch labels.

528

529

530

531

532 **Table 3:** Tabular representation of genome sequences of all 5 isolates with reference to Wuhan  
533 strain (NC\_045512).

| <b>Sample</b>     | <b>Name</b> | <b>Clade</b> | <b>Total Coverage</b> | <b>Missing region</b> | <b># of missing bases</b> | <b># Of nonsynonymous mutation</b> |
|-------------------|-------------|--------------|-----------------------|-----------------------|---------------------------|------------------------------------|
| Swab (S)          | ILS01       | 19A          | 29665                 | 1-30                  | 30                        | 11                                 |
|                   | ILS02       | 20A          | 29836                 | 1-54,521-530          | 64                        | 27                                 |
|                   | ILS03       | 20A          | 29688                 | 1-2                   | 2                         | 9                                  |
|                   | ILS15       | 20B          | 29680                 | 1-33                  | 33                        | 9                                  |
|                   | ILS24       | 19B          | 29805                 | 1-30                  | 30                        | 6                                  |
| Adapted Virus (A) | ILS01       | 19A          | 29836                 | 1-32                  | 32                        | 12                                 |
|                   | ILS02       | 19B          | 29873                 | 1-4                   | 4                         | 11                                 |
|                   | ILS03       | 20A          | 29836                 | 1-4                   | 4                         | 11                                 |
|                   | ILS15       | 20A          | 29836                 | 1-29                  | 29                        | 6                                  |
|                   | ILS24       | 19B          | 29836                 | 1-29                  | 29                        | 9                                  |

534

535

536

537

538

539

540

541

542

543

544

545

546

547

548

549 **Table 4:** Tabular representation of SARS-CoV2 gene-specific non-synonymous mutations in  
 550 both the swab samples and cell culture adapted strains.

| Name  | # of mutation Swab sample | # of mutation Adapted virus | Common Mutations                                                                                                                                                                | Reversion of mutation                                                                | Gain of mutation                                                            |
|-------|---------------------------|-----------------------------|---------------------------------------------------------------------------------------------------------------------------------------------------------------------------------|--------------------------------------------------------------------------------------|-----------------------------------------------------------------------------|
| ILS01 | 11                        | 12                          | <b>ORF1ab;</b> (G11083T, C13730T, C19524T, G1820A, C6310A, C1498T, C6312A, C9451T)<br><b>Spike;</b> (C23929T),<br><b>Membrane;</b> (T26861C),<br><b>Nucleocapsid;</b> (C28311T) | None                                                                                 | <b>Spike;</b> (A23014C)                                                     |
| ILS03 | 9                         | 11                          | <b>5'-UTR;</b> C241T,<br><b>ORF1ab;</b> (C3037T, C14408T, T20874A, C21297A),<br><b>Spike;</b> (C21614T, G22343A, A23403G)                                                       | None                                                                                 | <b>ORF1ab;</b> (G19514T),<br><b>Spike;</b> (A24538C)                        |
| ILS15 | 9                         | 6                           | <b>5'-UTR;</b> C241T,<br><b>ORF1ab;</b> (C3037T, C14408T),<br><b>Spike;</b> (A23403G)                                                                                           | <b>ORF1ab;</b> (C8917T, G9389A),<br><b>Nucleocapsid;</b> (G28881A, G28882A, G28883C) | <b>Spike;</b> (T21703G, C22444T)                                            |
| ILS24 | 6                         | 9                           | <b>ORF1ab;</b> (C8782T, G22468T),<br><b>ORF8;</b> (T28144C),<br><b>Nucleocapsid;</b> (G28878A, G29742A)                                                                         | <b>Membrane;</b> (G26730T)                                                           | <b>ORF1ab;</b> (C2143T, C10138T, C10702T)<br><b>Nucleocapsid;</b> (G28326T) |

551

552

553

554
